# Supplementary material for: Effect of Aeration and External Carbon Source on Nitrogen Removal and Distribution Patterns of Related-Microorganisms in Horizontal Subsurface Flow Constructed Wetlands
Source: MDPI journal article supplement (doi:10.3390/w16050632), 2024-02-21
Supplement: s1 [file s1]

Table S1: Functional bacteria for nitrogen removal at different treatments in the fore and rear end of HSSFCWs

| Functions                    | Genus                 | Relative abundance (%) |        |         |        |         |        |         |        |
|------------------------------|-----------------------|------------------------|--------|---------|--------|---------|--------|---------|--------|
|                              |                       | F_CW_CA                | F_CW_A | F_CW_CK | F_CW_C | R_CW_CA | R_CW_A | R_CW_CK | R_CW_C |
| Ammonia oxidizing            | Sphingomonas          | 2.663                  | 2.294  | 1.832   | 1.138  | 1.892   | 2.059  | 2.316   | 1.757  |
|                              | Arthrobacter          | 1.380                  | 1.543  | 0.329   | 0.163  | 1.617   | 0.621  | 0.678   | 0.098  |
|                              | Nitrospira            | 0.379                  | 0.624  | 0.486   | 0.375  | 0.334   | 0.459  | 0.664   | 0.699  |
|                              | Prostheco bacter      | 0.025                  | 0.039  | 0.009   | 0.008  | 0.034   | 0.047  | 0.002   | 0.035  |
| Nitrite oxidizing            | Nitrospira            | 1.192                  | 1.214  | 1.255   | 1.076  | 1.412   | 1.727  | 0.839   | 1.420  |
|                              | Candidatus_Nitroto ga | 0.015                  | 0.001  | 0.003   | 0.000  | 0.012   | 0.009  | 0.002   | 0.000  |
|                              | Nitro bacter          | 0.002                  | 0.004  | 0.006   | 0.000  | 0.006   | 0.043  | 0.080   | 0.025  |
| Anaerobic ammonium oxidizing | Planctomyces          | 0.013                  | 0.010  | 0.000   | 0.001  | 0.006   | 0.005  | 0.003   | 0.008  |
|                              | Pirellula             | 0.006                  | 0.005  | 0.008   | 0.005  | 0.004   | 0.011  | 0.005   | 0.006  |
| Denitrification              | Acinetobacter         | 3.080                  | 0.478  | 0.899   | 30.073 | 14.212  | 0.536  | 1.913   | 1.075  |
|                              | Dechloromonas         | 0.052                  | 0.037  | 0.043   | 0.051  | 0.026   | 0.040  | 0.062   | 0.056  |
|                              | Hyphomicrobium        | 0.942                  | 1.235  | 0.763   | 0.812  | 0.406   | 0.860  | 0.653   | 0.637  |
|                              | Bacillus              | 0.229                  | 0.073  | 0.020   | 0.023  | 0.228   | 0.060  | 0.032   | 0.017  |
|                              | Gaiella               | 1.010                  | 1.002  | 0.937   | 0.706  | 0.960   | 1.021  | 1.079   | 1.052  |
|                              | Pseudomonas           | 1.339                  | 0.597  | 0.469   | 0.679  | 3.093   | 0.715  | 1.148   | 1.095  |
|                              | Rhizobium             | 0.734                  | 0.716  | 1.020   | 0.657  | 0.904   | 0.926  | 1.270   | 1.090  |
|                              | Mesorhizobium         | 0.537                  | 0.817  | 0.643   | 0.658  | 0.520   | 0.666  | 0.754   | 0.692  |
|                              | Pseudoxanthomonas     | 0.308                  | 0.014  | 0.019   | 0.005  | 0.881   | 0.031  | 0.041   | 0.056  |
|                              | Hydrogenophaga        | 0.337                  | 0.173  | 0.231   | 0.349  | 0.579   | 0.173  | 0.257   | 0.468  |
|                              | Novosphingobium       | 0.283                  | 0.215  | 0.290   | 0.204  | 0.362   | 0.406  | 0.544   | 0.217  |
|                              | Lysobacter            | 0.409                  | 0.321  | 0.224   | 0.123  | 0.486   | 0.153  | 0.138   | 0.124  |
|                              | Chryseobacterium      | 0.117                  | 0.189  | 0.024   | 0.018  | 0.439   | 0.031  | 0.034   | 0.020  |
|                              | Flavobacterium        | 0.246                  | 0.058  | 0.054   | 0.037  | 0.353   | 0.241  | 0.106   | 0.027  |
|                              | Haliangium            | 0.106                  | 0.113  | 0.119   | 0.099  | 0.146   | 0.092  | 0.102   | 0.201  |
|                              | Terrimonas            | 0.211                  | 0.341  | 0.216   | 0.261  | 0.100   | 0.148  | 0.160   | 0.267  |
|                              | Devosia               | 0.135                  | 0.225  | 0.345   | 0.143  | 0.169   | 0.146  | 0.372   | 0.190  |
|                              | Thiobacillus          | 0.231                  | 0.183  | 0.125   | 0.053  | 0.241   | 0.020  | 0.054   | 0.051  |
|                              | Arenimonas            | 0.234                  | 0.154  | 0.164   | 0.207  | 0.098   | 0.127  | 0.175   | 0.327  |
|                              | Massilia              | 0.103                  | 0.144  | 0.024   | 0.042  | 0.326   | 0.110  | 0.051   | 0.048  |
|                              | Thermomonas           | 0.155                  | 0.160  | 0.063   | 0.019  | 0.112   | 0.099  | 0.167   | 0.107  |
|                              | Thauera               | 0.095                  | 0.108  | 0.085   | 0.019  | 0.118   | 0.034  | 0.015   | 0.015  |
|                              | Acidovorax            | 0.147                  | 0.079  | 0.143   | 0.045  | 0.126   | 0.015  | 0.014   | 0.020  |
|                              | Brevundimonas         | 0.053                  | 0.136  | 0.062   | 0.043  | 0.103   | 0.074  | 0.037   | 0.026  |
|                              | Aeromonas             | 0.136                  | 0.010  | 0.001   | 0.066  | 0.126   | 0.034  | 0.010   | 0.016  |
|                              | Sphingobium           | 0.076                  | 0.092  | 0.148   | 0.026  | 0.029   | 0.094  | 0.082   | 0.069  |
|                              | Defluviimonas         | 0.041                  | 0.058  | 0.014   | 0.066  | 0.024   | 0.034  | 0.017   | 0.040  |
|                              | Roseomonas            | 0.093                  | 0.033  | 0.063   | 0.039  | 0.103   | 0.078  | 0.083   | 0.083  |
|                              | Bdellovibrio          | 0.083                  | 0.069  | 0.029   | 0.030  | 0.098   | 0.073  | 0.055   | 0.061  |
|                              | Paracoccus            | 0.028                  | 0.013  | 0.003   | 0.005  | 0.035   | 0.017  | 0.011   | 0.008  |
|                              | Luteimonas            | 0.019                  | 0.009  | 0.000   | 0.000  | 0.033   | 0.008  | 0.005   | 0.014  |
|                              | Pedobacter            | 0.016                  | 0.008  | 0.007   | 0.003  | 0.029   | 0.024  | 0.009   | 0.012  |

|                   |       |       |       |       |       |       |       |       |
|-------------------|-------|-------|-------|-------|-------|-------|-------|-------|
| Shinella          | 0.002 | 0.002 | 0.000 | 0.000 | 0.112 | 0.115 | 0.059 | 0.077 |
| Dokdonella        | 0.005 | 0.009 | 0.094 | 0.000 | 0.002 | 0.003 | 0.011 | 0.004 |
| Zoogloea          | 0.007 | 0.002 | 0.002 | 0.002 | 0.001 | 0.004 | 0.000 | 0.004 |
| Simplicispira     | 0.005 | 0.016 | 0.000 | 0.001 | 0.002 | 0.002 | 0.030 | 0.000 |
| Rhodopseudomonas  | 0.002 | 0.002 | 0.001 | 0.000 | 0.007 | 0.001 | 0.012 | 0.006 |
| Janthinobacterium | 0.000 | 0.000 | 0.000 | 0.000 | 0.138 | 0.012 | 0.019 | 0.014 |
| Acidovorax        | 0.000 | 0.000 | 0.000 | 0.000 | 0.126 | 0.015 | 0.014 | 0.020 |
| Opitutus          | 0.000 | 0.000 | 0.000 | 0.000 | 0.054 | 0.029 | 0.009 | 0.033 |
| Arcobacter        | 0.000 | 0.000 | 0.000 | 0.000 | 0.014 | 0.005 | 0.000 | 0.001 |

<sup>1</sup>F\_CW\_CK, F\_CW\_A, F\_CW\_C, F\_CW\_CA represented control, aeration, carbon addition, combination of aeration and carbon source in the fore end of the HSSFCWs, R\_CW\_CK, R\_CW\_A, R\_CW\_C, R\_CW\_CA represented control, aeration, carbon addition, combination of aeration and carbon source in the rear end of the HSSFCWs.
